# Supplementary material for: In situ reconstruction of ZIF-8 loaded on fibrous supports
Source: Royal Society of Chemistry journal article supplement (doi:10.1039/d1ce00790d), 2021-01-01
Supplement: d1ce00790d1.pdf [file d1ce00790d1.pdf]

## Supporting Information

### In Situ Reconstruction of ZIF-8 Loaded on Fibrous Supports

Leilei Song,<sup>abc</sup> Siqu Li,<sup>a</sup> and Tao Li<sup>\*a</sup>

<sup>a</sup>*School of Physical Science and Technology, ShanghaiTech University, 201210 Shanghai, People's Republic of China*

<sup>b</sup>*Shanghai Advanced Research Institute, Chinese Academy of Sciences 201203, Shanghai, People's Republic of China*

<sup>c</sup>*University of Chinese Academy of Sciences, Beijing 100049, People's Republic of China*

## Materials and Characterization Methods

### Materials

All other chemicals were obtained from commercial sources and were used without further purification.

### Characterization

High-resolution scanning electron microscopy (HRSEM) images were obtained using a JEOL JSM-IT-500HR SEM and JEOL JSM-7800F Prime SEM. Samples were coated with Au for 20 seconds using an SBC-12 sputter coater. Energy dispersive X-ray spectroscopy (EDS) elemental mapping results were obtained on a JSM-IT-500HR SEM (15 kV). Powder X-ray diffraction (PXRD) patterns were collected on an X-ray diffractometer (Bruker D2 PHASER or D8 ADVANCE). N<sub>2</sub> sorption data at 77 K were collected on a BELSORP Max II. Before gas adsorption-desorption measurement, all samples were activated under vacuum for 10 h at 120 °C.

### Experimental Details

**Synthesis of 900 ± 5 nm ZIF-8:** 219.5 mg (1 mmol) Zn(OAc)<sub>2</sub> and 656.8 mg (8 mmol) 2-methylimidazole (2-MIM) was separately dissolved into 20.0 mL methanol (MeOH) as stock solutions. Then, they were mixed and stirred for 5 min. The mixture was aged at room temperature for 12 h. The as-synthesized product was washed by methanol three times. The resulting material was suspended in methanol for further use.

**Synthesis of 15 ± 5 μm ZIF-8:** 588 mg (2.0 mmol) Zn(NO<sub>3</sub>)<sub>2</sub>·6H<sub>2</sub>O was dissolved in 40 ml methanol. 324 mg (4.0 mmol) 2-MIM and 538 mg (7.9 mmol) sodium formate (NaHCO<sub>2</sub>) were dissolved in 40 ml methanol. The molar ratio of Zn/2-MIM

/NaHCO<sub>2</sub>/MeOH was set at 1:2:4:1000. The ligand solution was poured into the metal solution under stirring. After mixing, stirring was immediately stopped. The solution was heated at 90 °C for 24 hours in a Teflon-lined autoclave. The product was rinsed by methanol for three times. The resulting material was suspended in methanol for further use.

**Preparation of ZIF-8▯fibrous support:** a prescribed amount of 120 mg/ml ZIF-8 suspension in methanol was drop-casted onto a piece of fibrous support (2×2 cm cotton fabric, filter paper or rockwool) and was allowed to evaporate naturally under room temperature. Then this process was repeated 2-3 times to afford three composites denoted as ZIF-8▯cotton, ZIF-8▯filter, and ZIF-8▯rockwool, respectively.

**Degradation of ZIF-8▯fibrous support:** ZIF-8▯cotton, ZIF-8▯filter, and ZIF-8▯rockwool, was placed on a glass slide and then loaded into a container containing an acetic acid/ethylene glycol mixture ( $V_{\text{acetic acid}} : V_{\text{ethylene glycol}} = 3:1$ ) at room temperature for 1 h to give ZIF-8▯cotton-DE, ZIF-8▯filter-DE, and ZIF-8▯rockwool-DE, respectively.

**In situ vapor-assisted reconstruction (VAR) process:** ZIF-8▯cotton-DE, ZIF-8▯filter-DE, and ZIF-8▯rockwool-DE were placed on a glass slide and loaded into a sealed stainless steel chamber (Figure S4) along with a small amount of methanol. The glass slide was suspended above the solvent layer. The chamber was placed in a 70 °C oven for 24 h. After cooling to room temperature, the sample was taken out, collected, and denoted as ZIF-8▯cotton-RE, ZIF-8▯filter-RE, and ZIF-8▯rockwool-RE, respectively.

**Estimate the porosity of fibrous materials:** Three fibrous materials were cut into square-shaped samples. The weight of each sample and the weight of the sample filled with water were measured by electronic balance. The porosity of these samples was calculated based on the retained water volume divided by the fibre mass which was 4.4, 2.3 and 12.5 cc/g for ZIF-8-cotton, ZIF-8-filter and ZIF-8-rockwool, respectively.

## Supplementary table

**Table S1.** ZIF-8 loading capacity of ZIF-8-cotton and ZIF-8-filter calculated from the N<sub>2</sub> uptake capacity.

| Samples                                                 | ZIF-8-cotton | ZIF-8-filter | ZIF-8 |
|---------------------------------------------------------|--------------|--------------|-------|
| N <sub>2</sub> uptake capacity at 0.95 P/P <sub>0</sub> | 118          | 164          | 410   |
| ZIF-8 loading capacity                                  | 29 wt%       | 40 wt%       | N/A   |

## Supplementary Figure

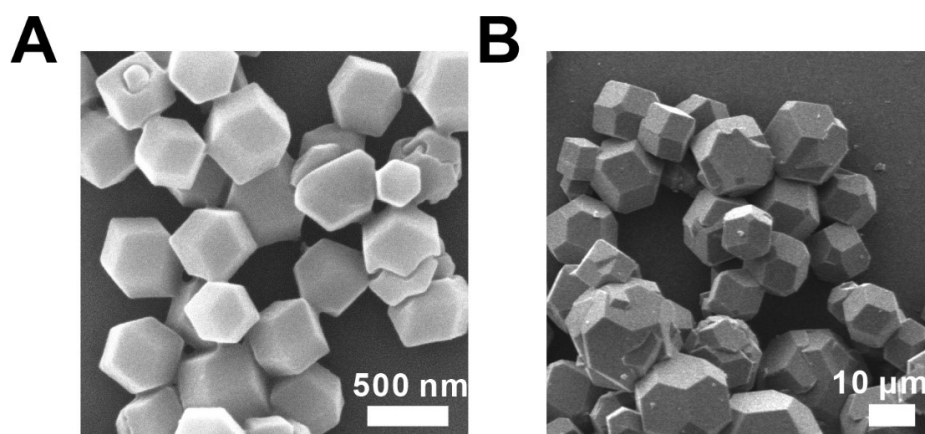

**Fig. S1** SEM images of (A) small and (B) large ZIF-8 particles

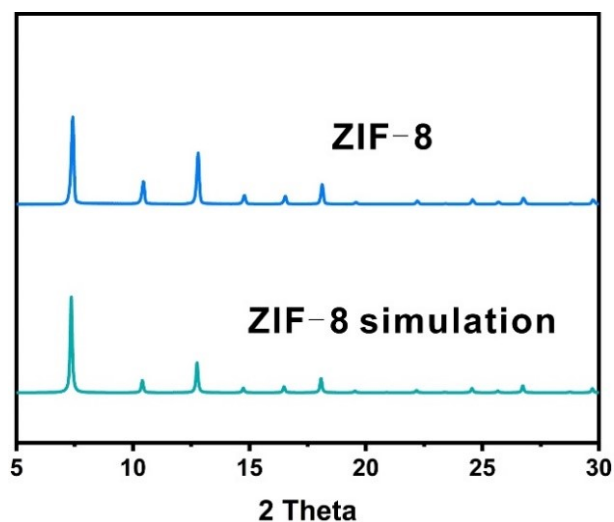

Fig. S2 The PXRD pattern of as synthesized ZIF-8 and ZIF-8 simulated from its crystal structure

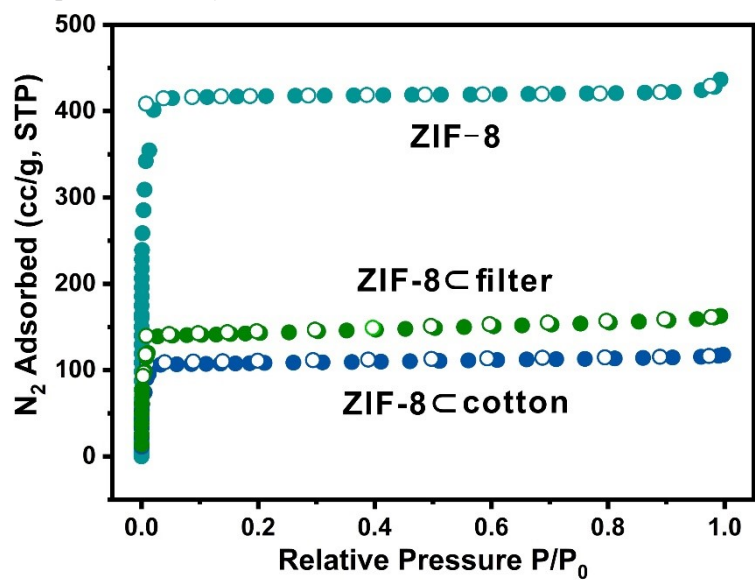

Fig. S3 77 K  $N_2$  sorption isotherms of neat ZIF-8, ZIF-8C cotton and ZIF-8C filter

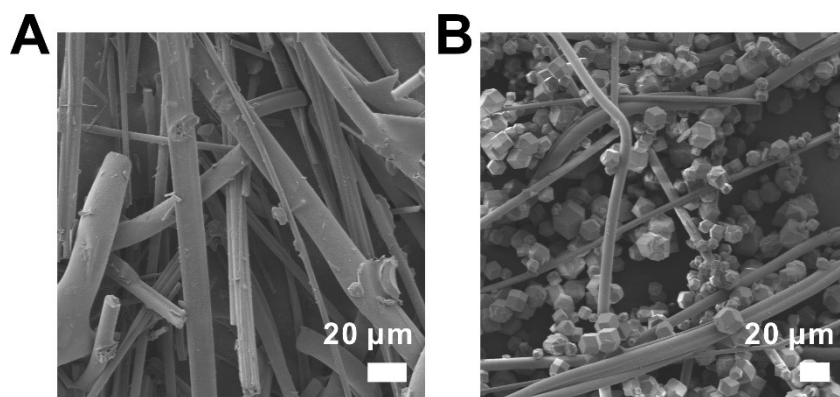

Fig. S4 SEM images of (A) rockwool and (B) ZIF-8C rockwool

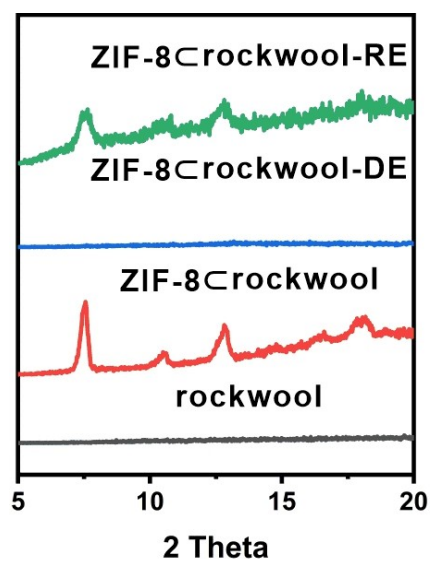

Fig. S5 PXRD patterns of ZIF-8 on rockwool before degradation, after degradation, and after reconstruction.

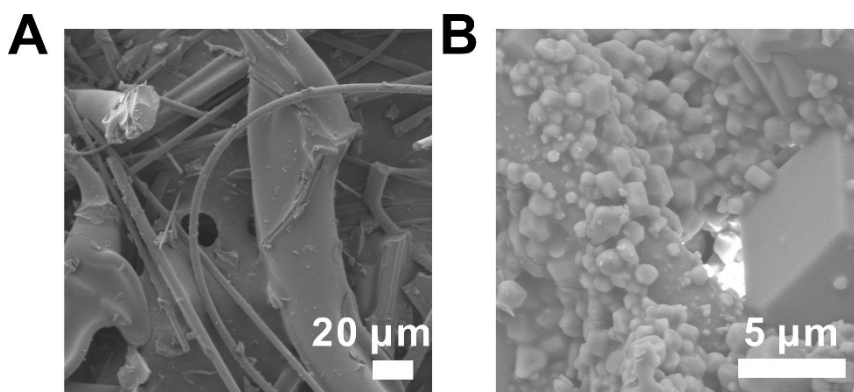

Fig. S6 SEM images of (A) ZIF-8 on rockwool-DE and (B) ZIF-8 on rockwool-RE

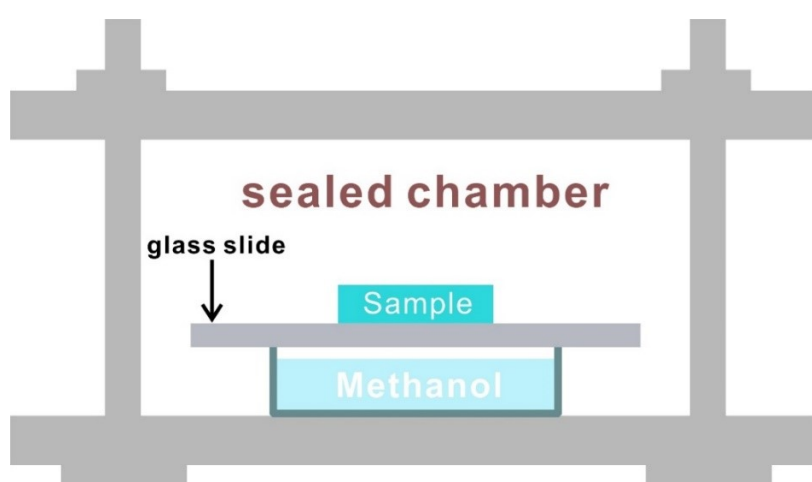

Fig. S7 Homemade stainless-steel sealed chamber for in situ vapor-assisted reconstruction.

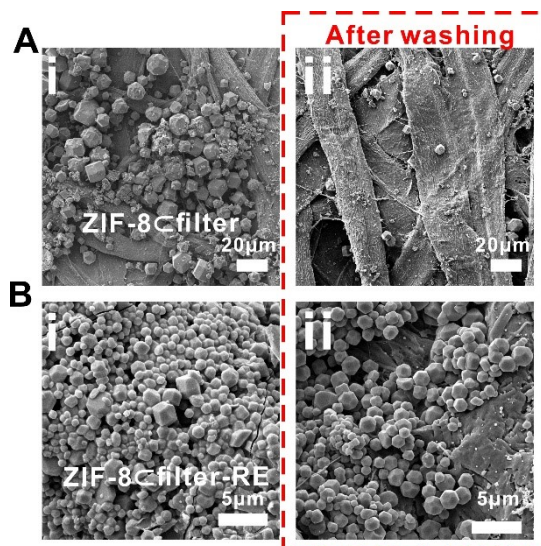

**Fig. S8** SEM images of (A) ZIF-8-coated filter and after washing (20 mins), (B) ZIF-8-coated filter-RE and after washing (20 mins).

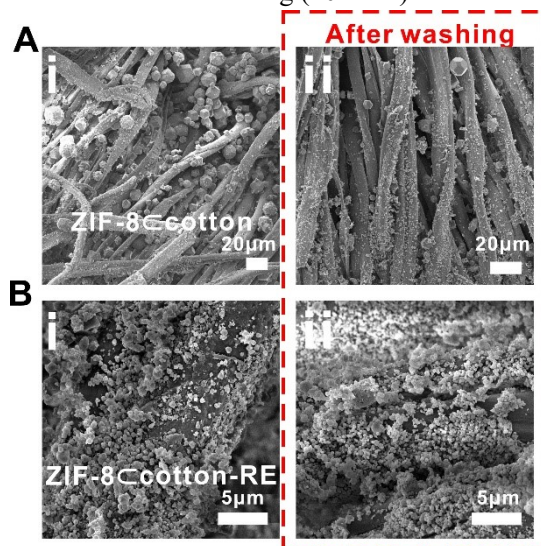

**Fig. S9** SEM images of (A) ZIF-8-coated cotton and after washing (20 mins), (B) ZIF-8-coated cotton-RE and after washing (20 mins).

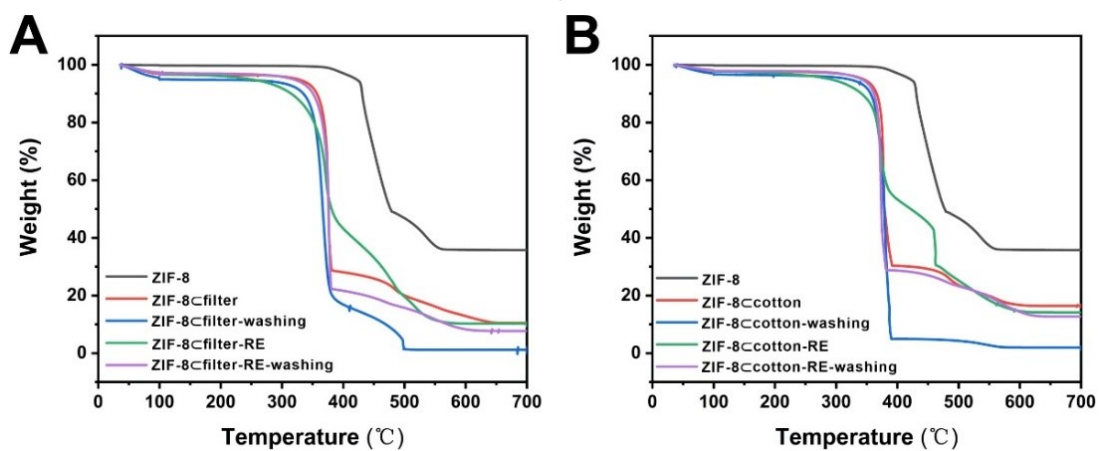

**Fig. S10** TGA images of (A) ZIF-8, ZIF-8-coated filter, ZIF-8-coated filter-washing, ZIF-8-coated filter-RE and ZIF-8-coated filter-RE-washing, (B) ZIF-8, ZIF-8-coated cotton, ZIF-8-coated cotton-washing, ZIF-8-coated cotton-RE and ZIF-8-coated cotton-RE-washing.
